# Supplementary material for: Regulation of adipose tissue inflammation by interleukin 6
Source: PubMed Central journal article supplement — Proc Natl Acad Sci U S A. 2020 Jan 24;117(6):2751–60. doi: 10.1073/pnas.1920004117 (PMC7022151; doi:10.1073/pnas.1920004117), 2020-01-24

**Fig 2G**

gWAT

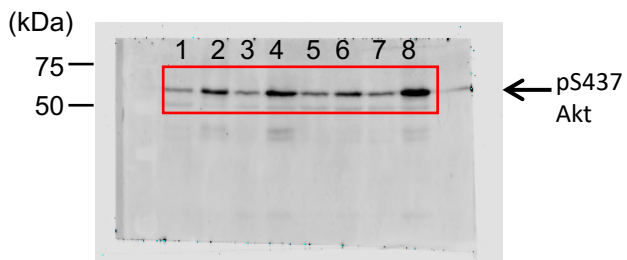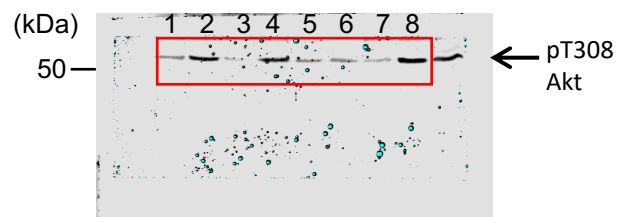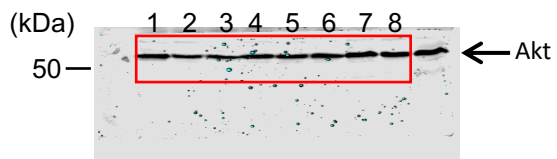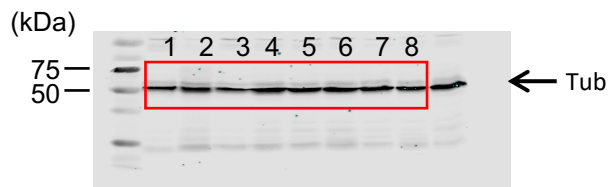**Fig 2H**

Liver

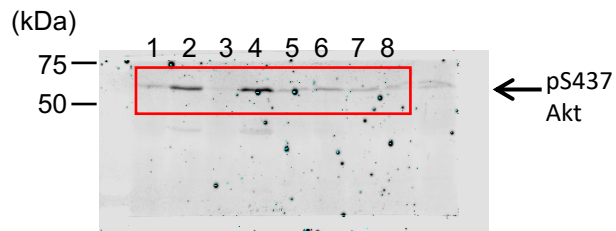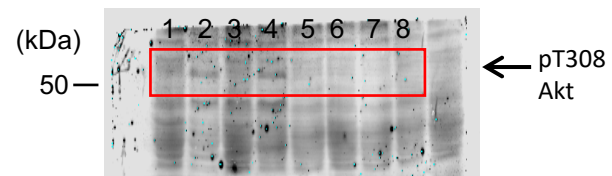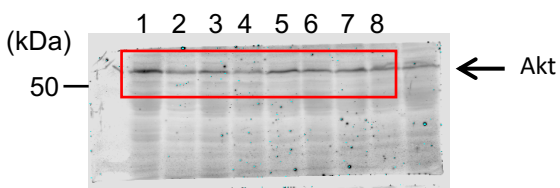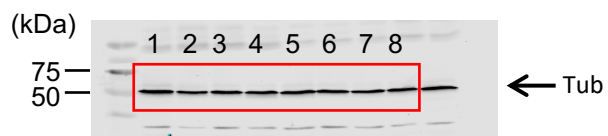**Fig 2I**

Muscle

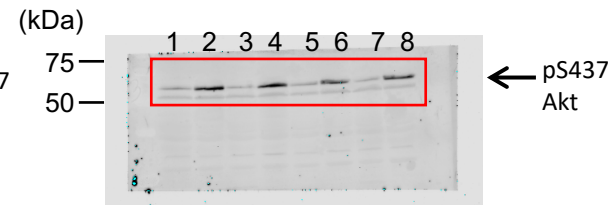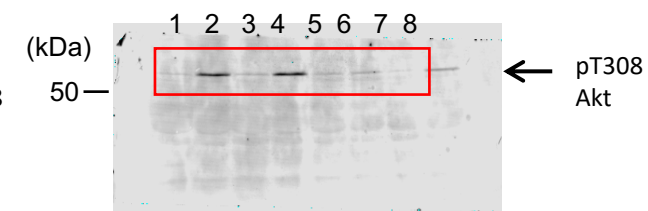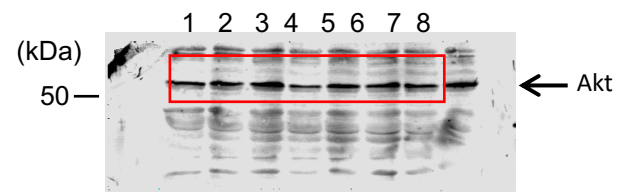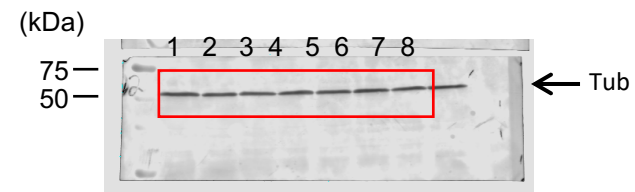

|              | AD <sup>WT</sup> |          | AD <sup>ΔIL6</sup> |          | AD <sup>WT</sup> |          | AD <sup>ΔIL6</sup> |          |
|--------------|------------------|----------|--------------------|----------|------------------|----------|--------------------|----------|
| Insulin      | -                | +        | -                  | +        | -                | +        | -                  | +        |
| <b>Lane:</b> | <b>1</b>         | <b>2</b> | <b>3</b>           | <b>4</b> | <b>5</b>         | <b>6</b> | <b>7</b>           | <b>8</b> |
|              | CD               |          |                    |          | HF               |          |                    |          |

**Fig S1D**

Lane 1: AD<sup>WT</sup>  
Lane 2: AD<sup>ΔIL6</sup>

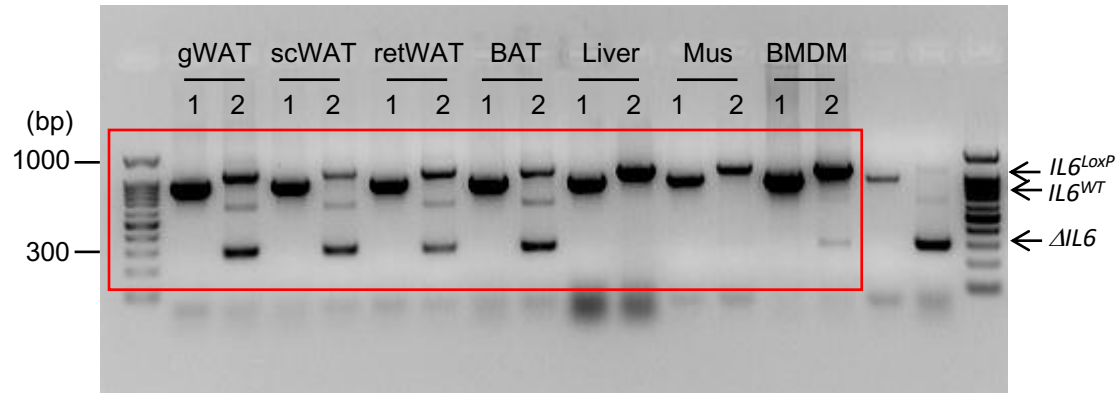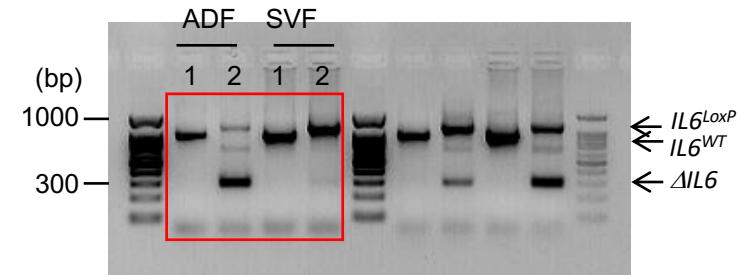**Fig S1E**

Lane 1:  $\Phi$ <sup>WT</sup>  
Lane 2:  $\Phi$ <sup>ΔIL6</sup>

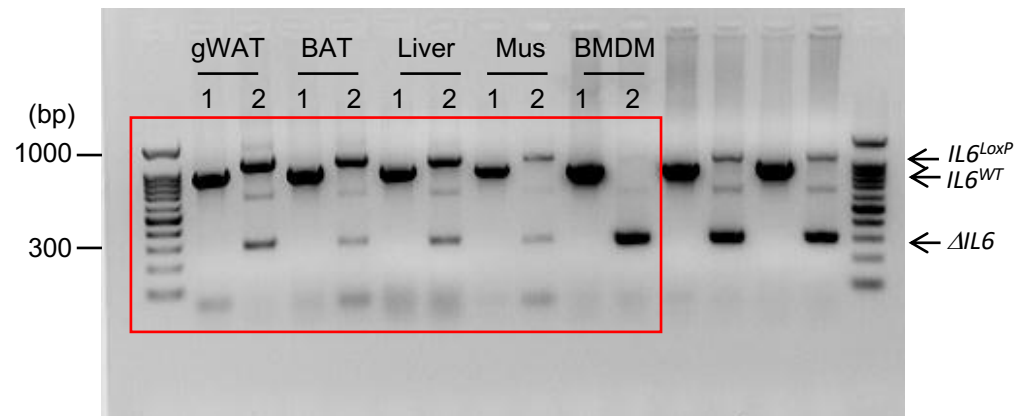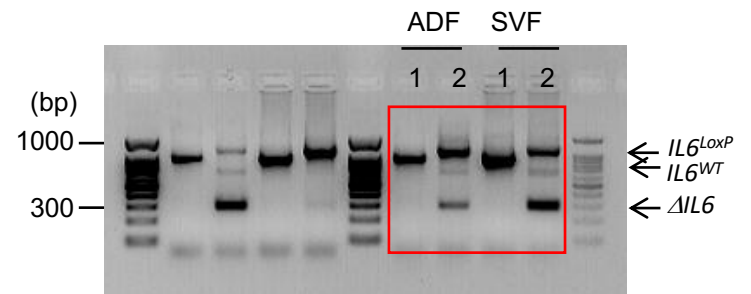

**Fig S5C**

gWAT

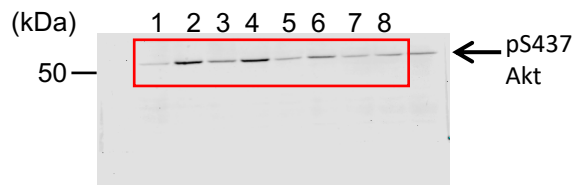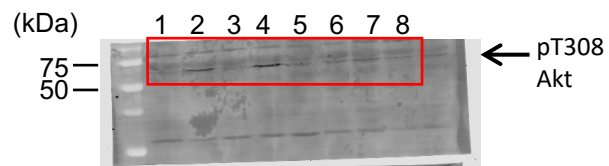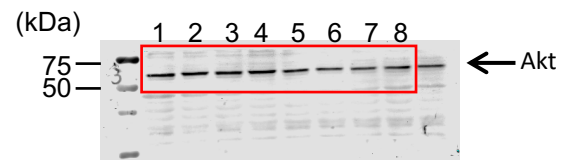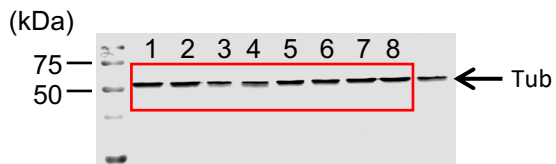**Fig S5D**

Liver

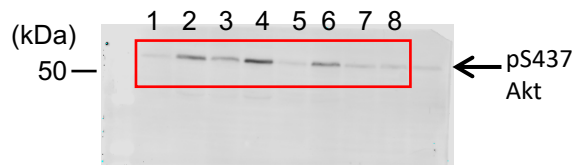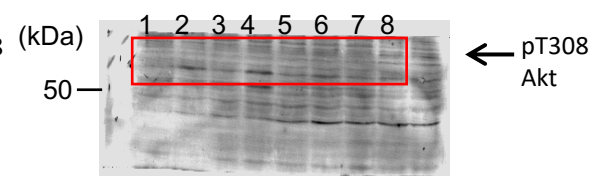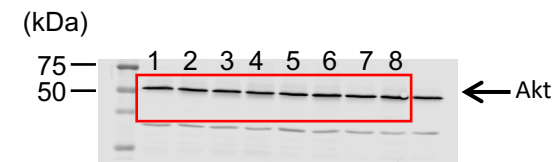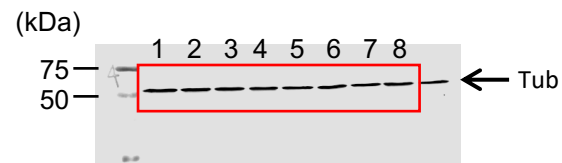**Fig S5E**

Muscle

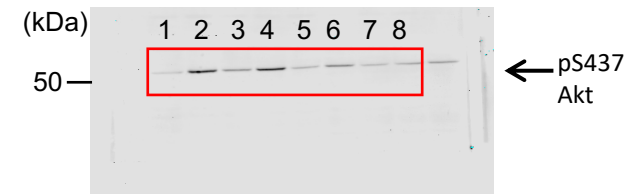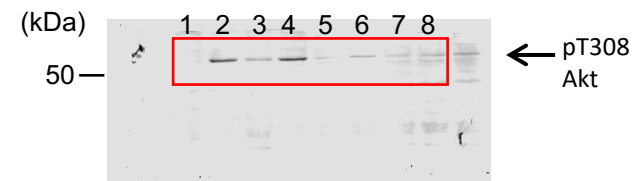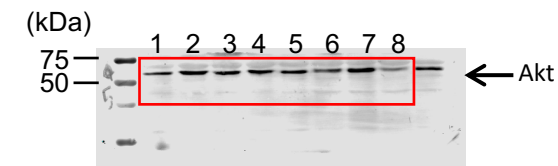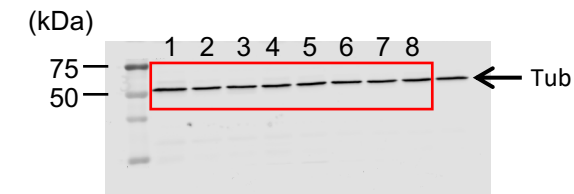

|              | $\Phi^{WT}$ |          | $\Phi^{\Delta IL6}$ |          | $\Phi^{WT}$ |          | $\Phi^{\Delta IL6}$ |          |
|--------------|-------------|----------|---------------------|----------|-------------|----------|---------------------|----------|
| Insulin      | -           | +        | -                   | +        | -           | +        | -                   | +        |
| <b>Lane:</b> | <b>1</b>    | <b>2</b> | <b>3</b>            | <b>4</b> | <b>5</b>    | <b>6</b> | <b>7</b>            | <b>8</b> |
|              | CD          |          |                     |          | HF          |          |                     |          |

# Fig S7A

Lane 1: M<sup>WT</sup>  
Lane 2: M<sup>ΔIL6</sup>

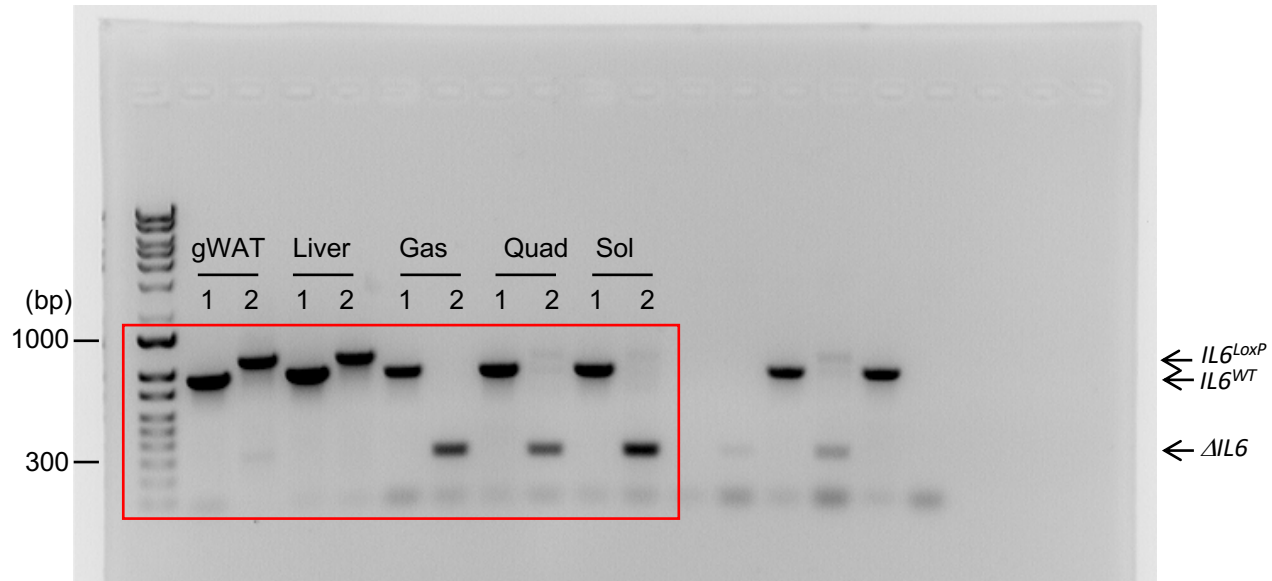

Supplement: pnas.1920004117.sd02.pdf [file pnas.1920004117.sd02.pdf]
