# Supplementary material for: Regulation of adipose tissue inflammation by interleukin 6
Source: PubMed Central journal article supplement — Proc Natl Acad Sci U S A. 2020 Jan 24;117(6):2751–60. doi: 10.1073/pnas.1920004117 (PMC7022151; doi:10.1073/pnas.1920004117), 2020-01-24
Supplement: pnas.1920004117.sapp.pdf [file pnas.1920004117.sapp.pdf]

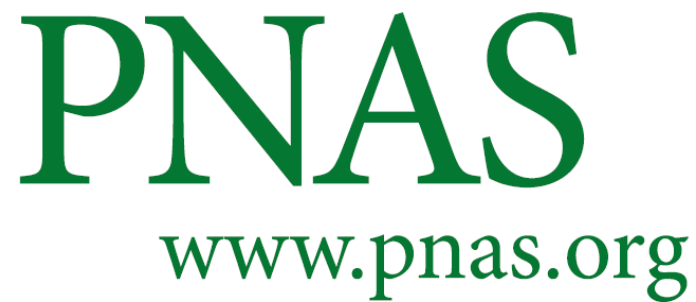

Supplementary Information for

**Regulation of adipose tissue inflammation by interleukin 6**

Myoung Sook Han<sup>1</sup>, Alexis White<sup>1</sup>, Rachel J. Perry<sup>2</sup>, Joao-Paulo Camporez<sup>2</sup>, Juan Hidalgo<sup>3</sup>,  
Gerald I. Shulman<sup>2</sup>, and Roger J. Davis<sup>1\*</sup>

Roger J. Davis

Email: [Roger.Davis@umassmed.edu](mailto:Roger.Davis@umassmed.edu)

**This PDF file includes:**

Figures S1 to S7

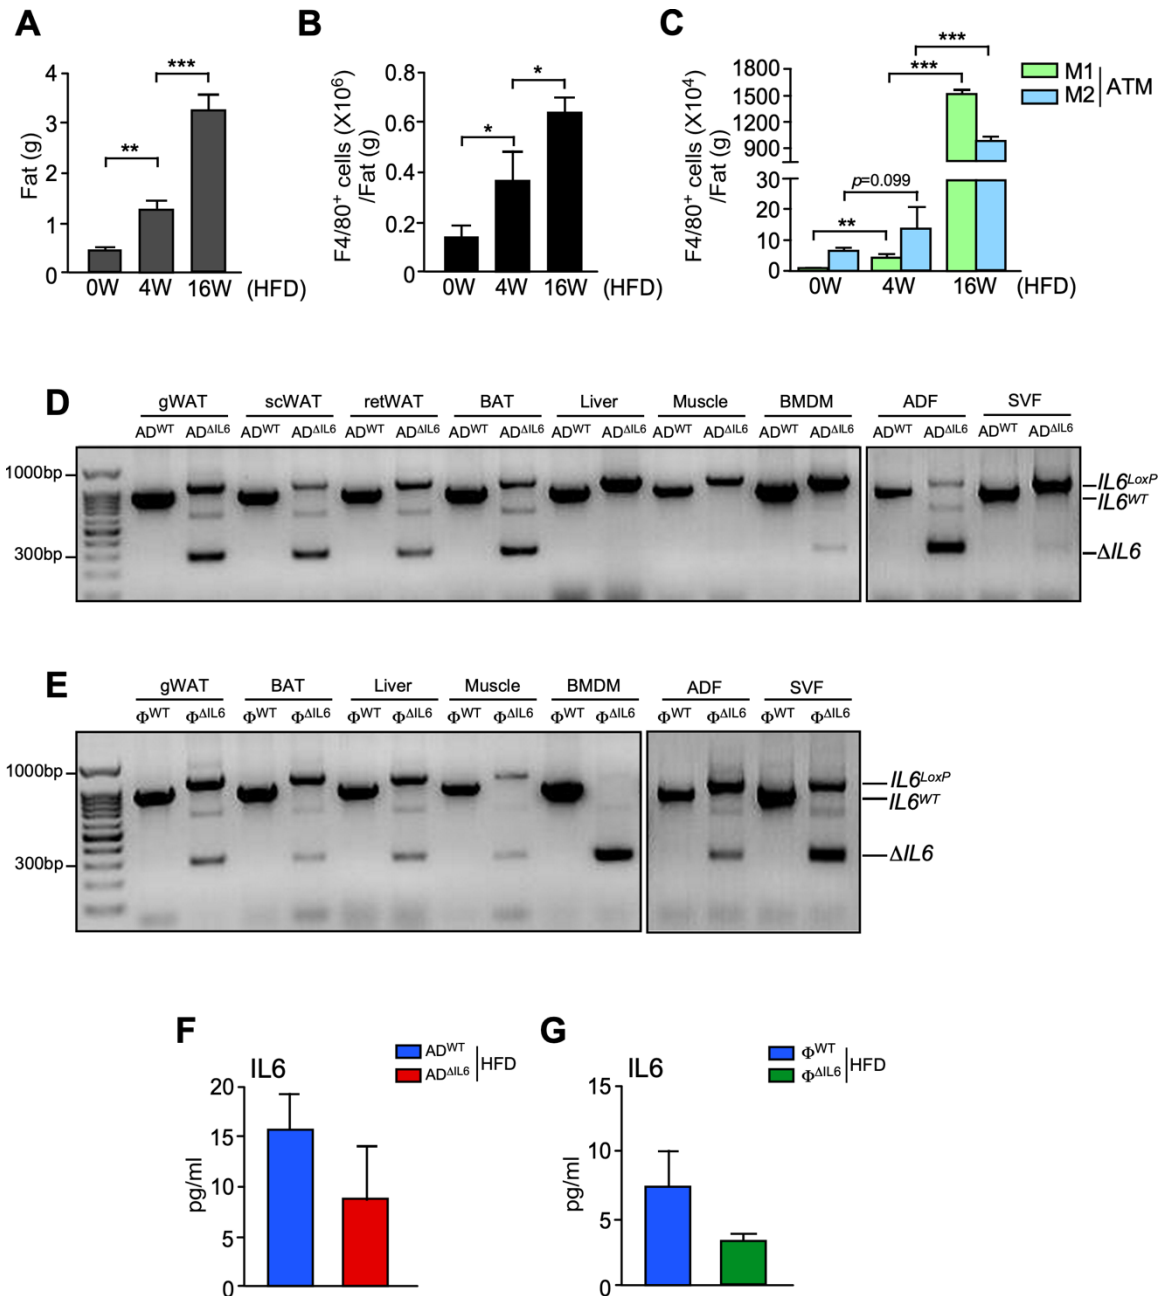

**Fig. S1.** (A) The gonadal fat mass from wild-type mice fed a HFD for 0, 4, and 16 wks was examined at age 24 wks (mean  $\pm$  S.E.M.;  $n = 2$ ; \*\* $p < 0.01$ , \*\*\* $p < 0.001$ ). (B,C) Immunophenotyping of adipose tissue macrophage (ATM) number was examined by flow cytometry (mean  $\pm$  S.E.M.;  $n = 2$ ; \* $p < 0.05$ , \*\* $p < 0.01$ , \*\*\* $p < 0.001$ ). (D, E) Genomic DNA isolated from gonadal (epididymal) white fat (gWAT), sub-cutaneous inguinal WAT (scWAT), retroperitoneal WAT (retWAT), brown adipose tissue (BAT), liver, muscle, bone marrow-derived macrophages (BMDM), adipocyte fraction of gWAT (ADF), and stromal vascular fraction of gWAT (SVF) from AD<sup>WT</sup> and AD<sup>ΔIL6</sup> mice and from Φ<sup>WT</sup> and Φ<sup>ΔIL6</sup> mice was examined by PCR analysis. (F,G) The serum concentration of IL6 in HFD-fed Control and IL6-deficient mice was measured by ELISA (mean  $\pm$  S.E.M.;  $n = 5 \sim 7$ ).

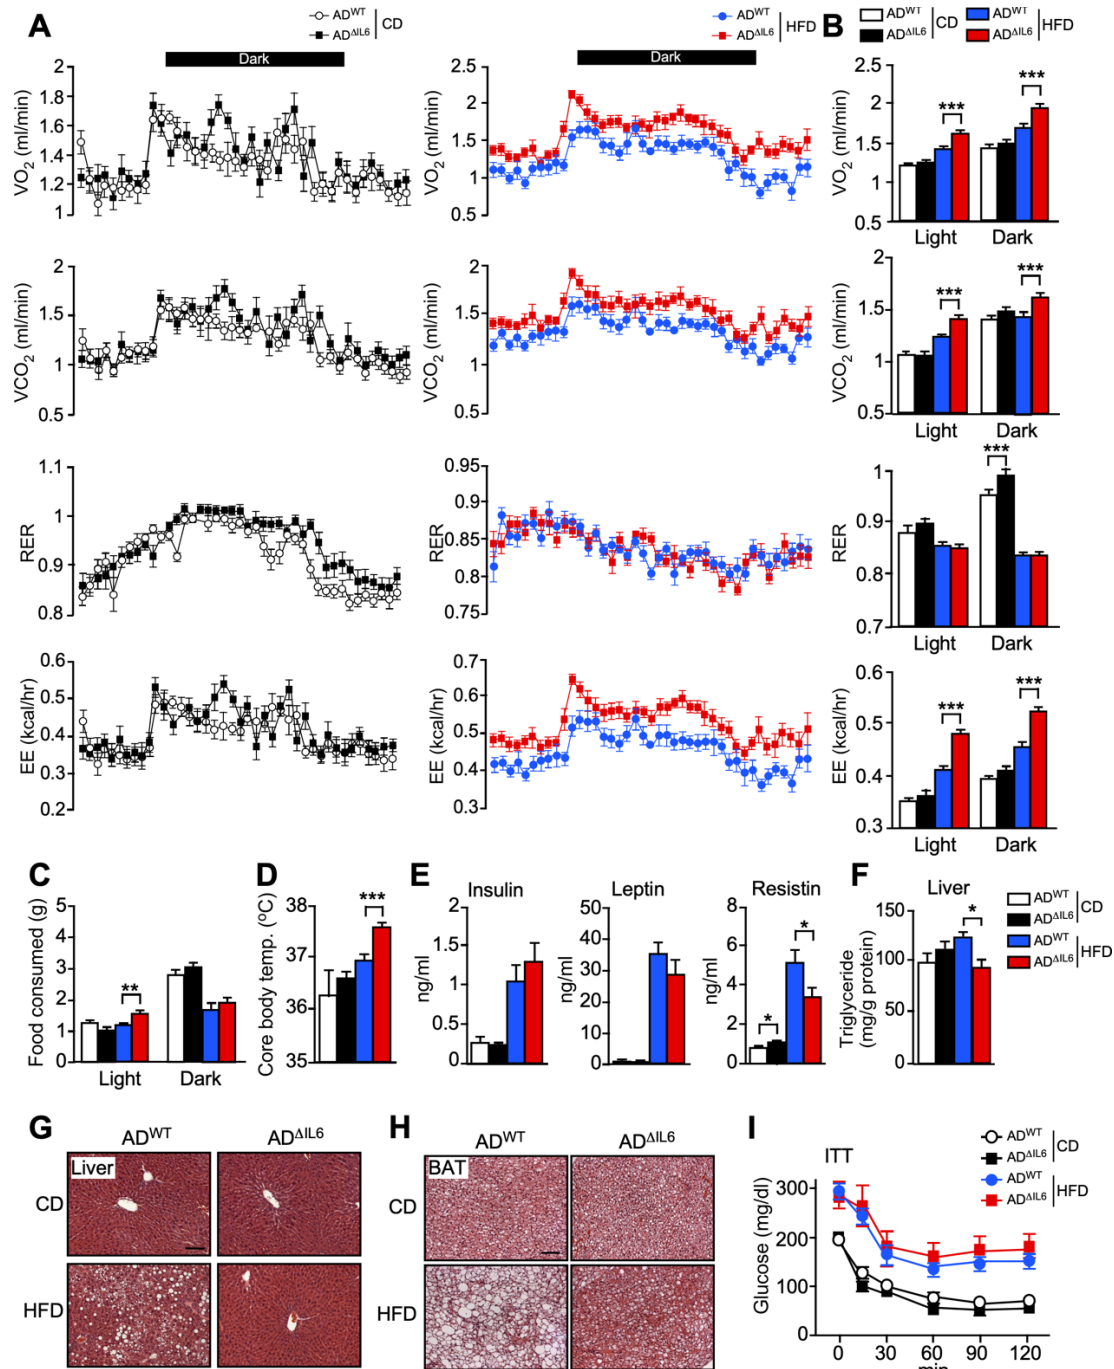

**Fig. S2.** (A-C) Metabolic cage analysis of chow diet (CD)-fed and high fat diet (HFD)-fed (6 wk.) mice was performed.  $VO_2$ ,  $VCO_2$ , respiratory exchange ratio (RER), energy expenditure (EE), and food intake per mouse are presented for AD<sup>WT</sup> and AD<sup>ΔIL6</sup> mice (mean  $\pm$  S.E.M.;  $n = 7 \sim 8$ ; \*\*\* $p < 0.001$ ). (D) Core body temperature was measured by telemetry using an implanted probe (mean  $\pm$  S.E.M.;  $n = 5 \sim 8$ ; \*\*\* $p < 0.001$ ). (E) The blood concentration of insulin, leptin, and resistin was measured in AD<sup>WT</sup> and AD<sup>ΔIL6</sup> mice fed a CD or a HFD (16 wk.) (mean  $\pm$  S.E.M.;  $n = 7 \sim 14$ ; \* $p < 0.05$ ). (F) The amount of hepatic triglyceride was measured (mean  $\pm$  S.E.M.;  $n = 5 \sim 6$ ; \* $p < 0.05$ ). (G) Sections of liver of CD-fed and HFD-fed AD<sup>WT</sup> and AD<sup>ΔIL6</sup> mice (16 wk.) were stained with hematoxylin & eosin (scale bar = 100  $\mu$ m). (H) Sections of BAT were stained with hematoxylin & eosin (H&E) (scale bar = 100  $\mu$ m). (I) CD-fed and HFD-fed (16 wk.) mice were examined by insulin tolerance tests (ITT) (mean  $\pm$  S.E.M.;  $n = 5 \sim 13$ ).

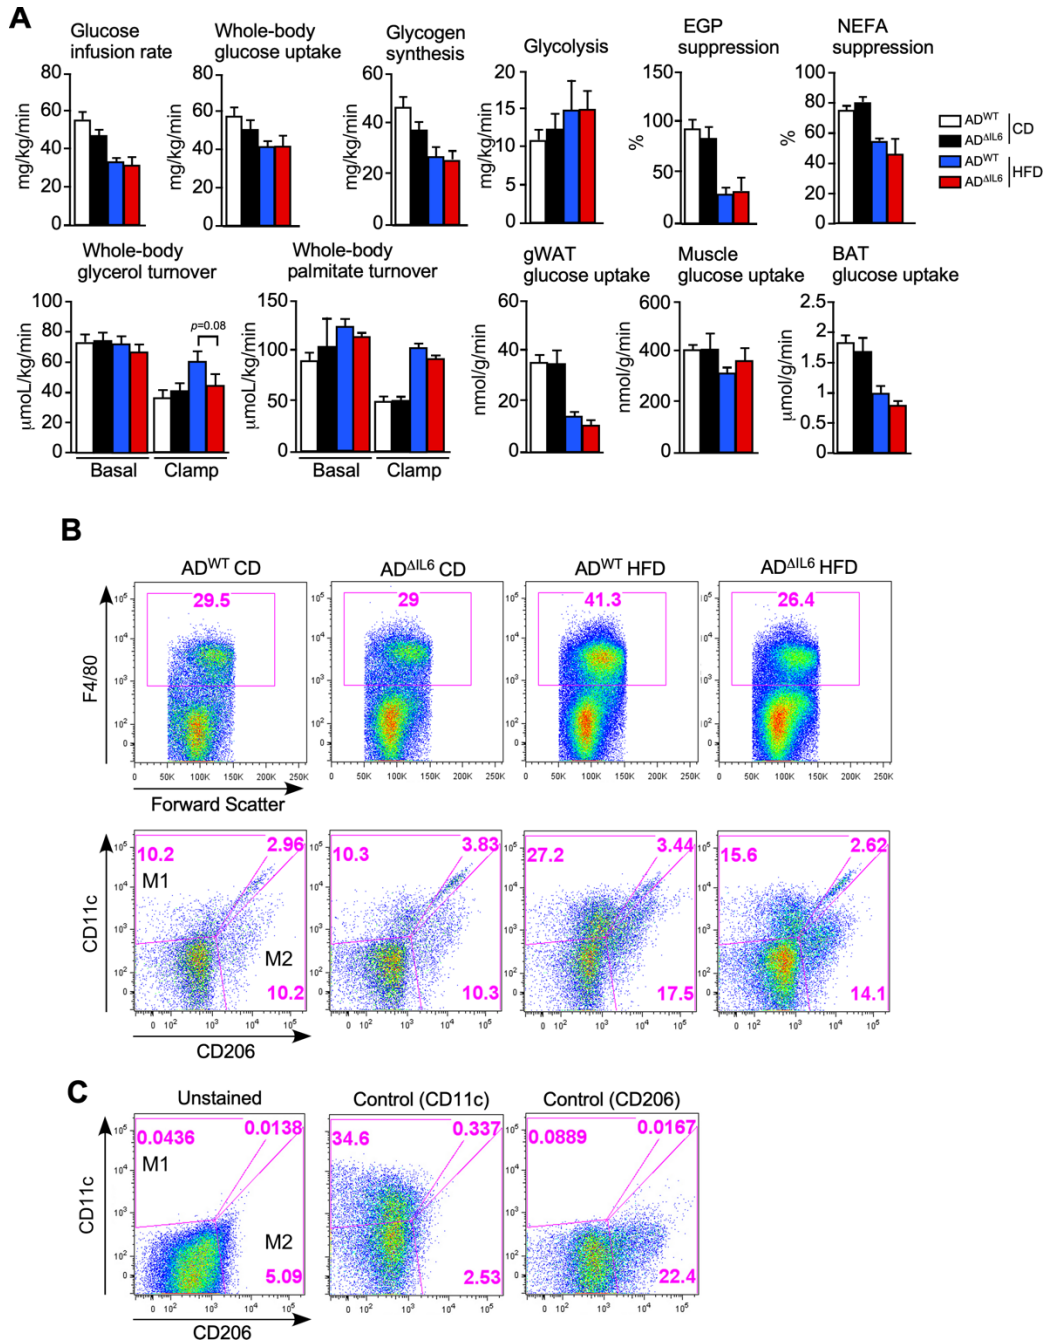

**Fig. S3.** (A) Hyperinsulinemic-euglycemic clamp study. The glucose infusion rate, whole-body glucose uptake, glycogen synthesis, glycolysis, endogenous glucose production (EGP), non-esterified fatty acid (NEFA) suppression, whole-body glycerol turnover, whole-body palmitate turnover, and glucose uptake in gWAT, muscle, and BAT were measured during clamps with CD-fed and HFD-fed (8 wk.) mice (mean  $\pm$  S.E.M.;  $n=5-7$ ). (B) The SVF of gWAT from CD-fed and HFD-fed AD<sup>WT</sup> and AD <sup>$\Delta$ IL6</sup> mice (16 wk.) was isolated and examined by flow cytometry. Representative data are presented. The F4/80<sup>+</sup> cells (*upper panels*) were examined by staining with CD11c and CD206 (*lower panels*). (C) The strategy employed for flow cytometry analysis is presented. F4/80<sup>+</sup> cells stained without (un-stained; *left panel*) or with CD206 plus an isotype control antibody for CD11c (*middle panel*) or CD11c plus an isotype control antibody for CD206 (*right panel*) were examined. Gates for M1-like (CD11c<sup>+</sup> CD206<sup>-</sup>) and M2-like (CD11c<sup>-</sup> CD206<sup>+</sup>) macrophages are indicated. Representative data are presented.

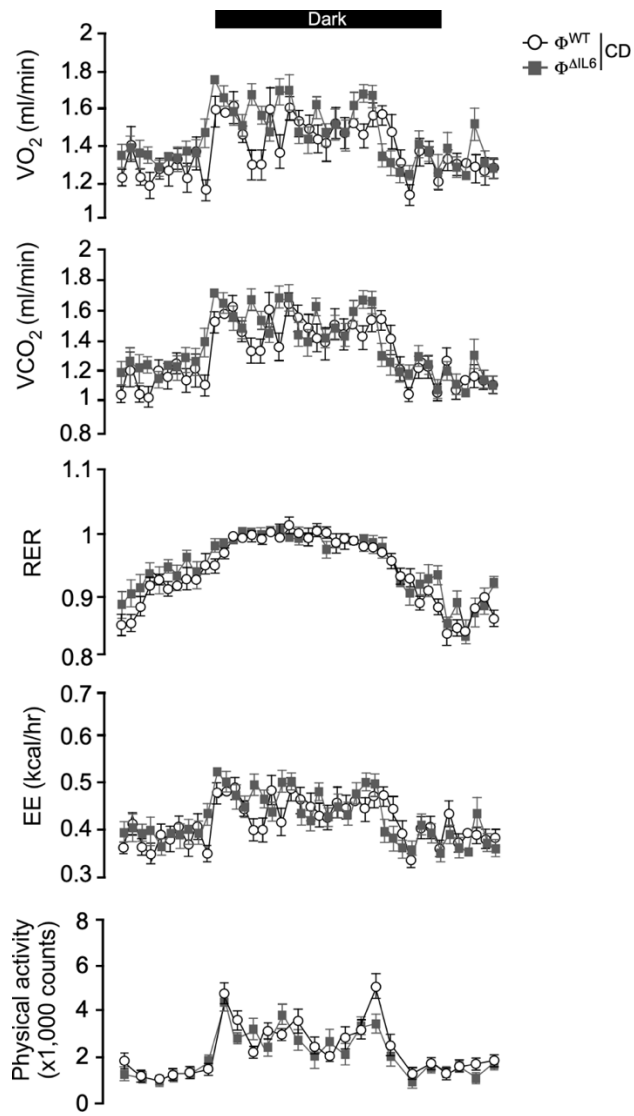

**Fig. S4.** Metabolic cage analysis of CD-fed  $\Phi^{WT}$  and  $\Phi^{\Delta IL6}$  mice (6 wk.) during a 24h period. The  $VO_2$ ,  $VCO_2$ , RER, EE, and physical activity per mouse are presented (mean  $\pm$  S.E.M.;  $n = 7 \sim 8$ ).

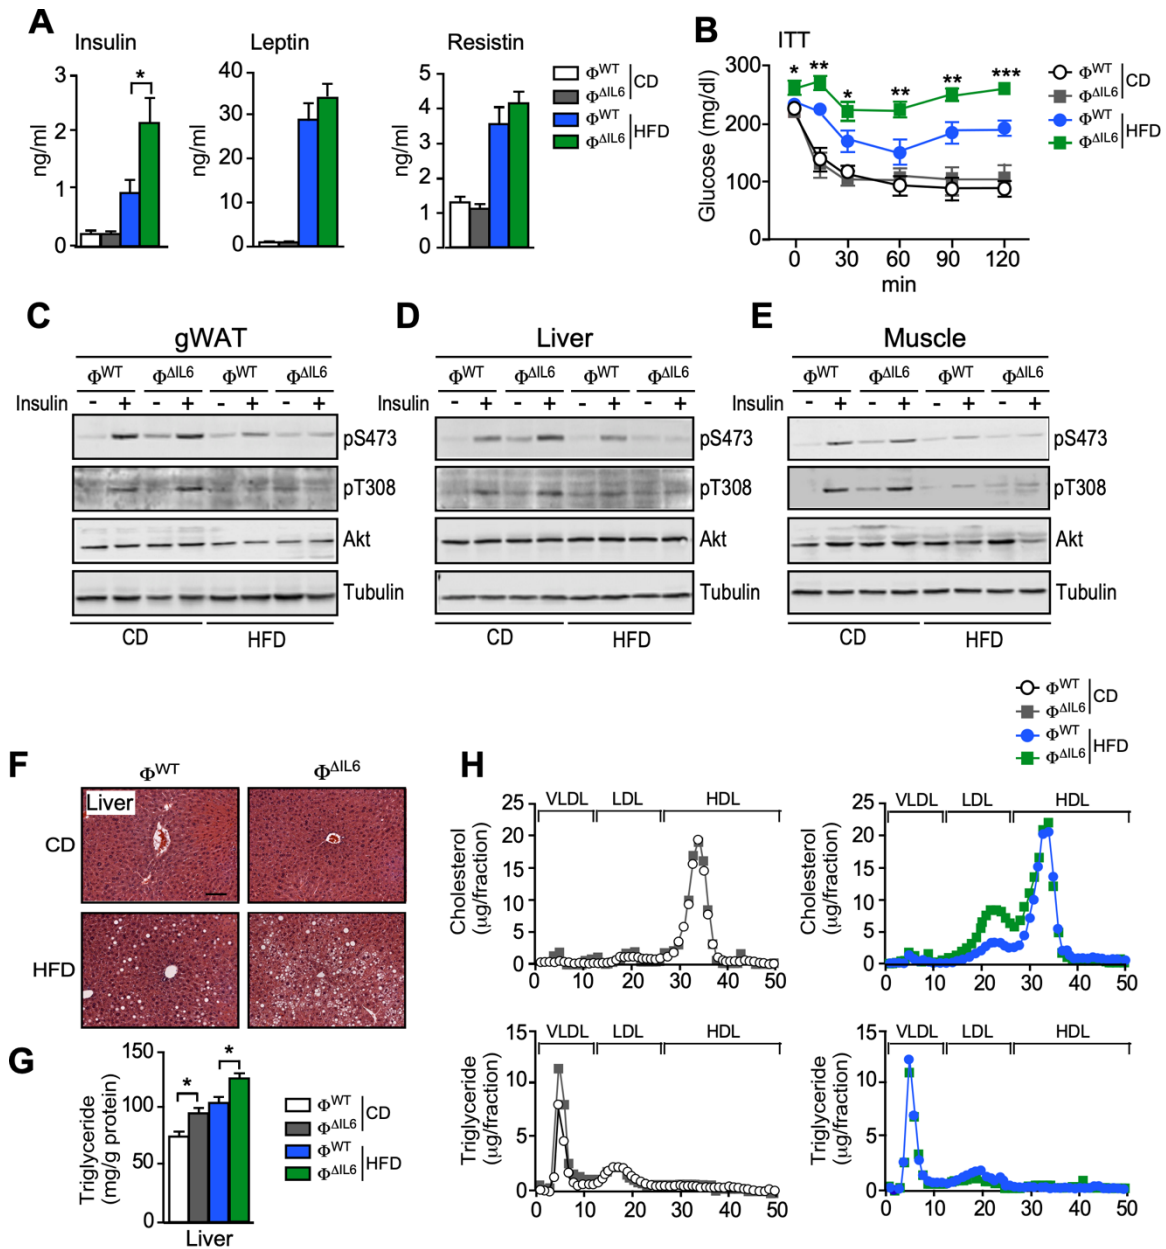

**Fig S5.** (A) The blood concentration of insulin, leptin, and resistin was measured in CD-fed and HFD-fed  $\Phi^{WT}$  and  $\Phi^{\Delta IL6}$  mice (16 wk.) (mean  $\pm$  S.E.M.;  $n = 6 \sim 8$ ;  $*p < 0.05$ ). (B) CD-fed and HFD-fed (16 wk.) mice were examined by ITT (mean  $\pm$  S.E.M.;  $n = 5 \sim 8$ ;  $*p < 0.05$ ,  $**p < 0.01$ ,  $***p < 0.001$ ). (C-E) The CD and HFD-fed mice (16 wk.) were fasted overnight and then treated by intraperitoneal injection with 1 U/kg insulin (15 min). Immunoblot analysis of gWAT, liver, and gastrocnemius muscle was performed by probing with antibodies to pThr<sup>308</sup>-Akt, pSer<sup>473</sup>-Akt, Akt, and  $\alpha$ Tubulin. (F) Liver sections of CD-fed and HFD-fed  $\Phi^{WT}$  and  $\Phi^{\Delta IL6}$  mice (16 wk.) were stained with H&E (scale bar = 100  $\mu$ m). (G) The amount of hepatic triglyceride was measured (mean  $\pm$  S.E.M.;  $n = 5 \sim 8$ ;  $*p < 0.05$ ). (H) Blood lipoprotein analysis in  $\Phi^{WT}$  and  $\Phi^{\Delta IL6}$  mice on CD or HFD for 16 wk. was measured by fast performance liquid chromatography (FPLC) separation of pooled plasma ( $n = 5$ ).

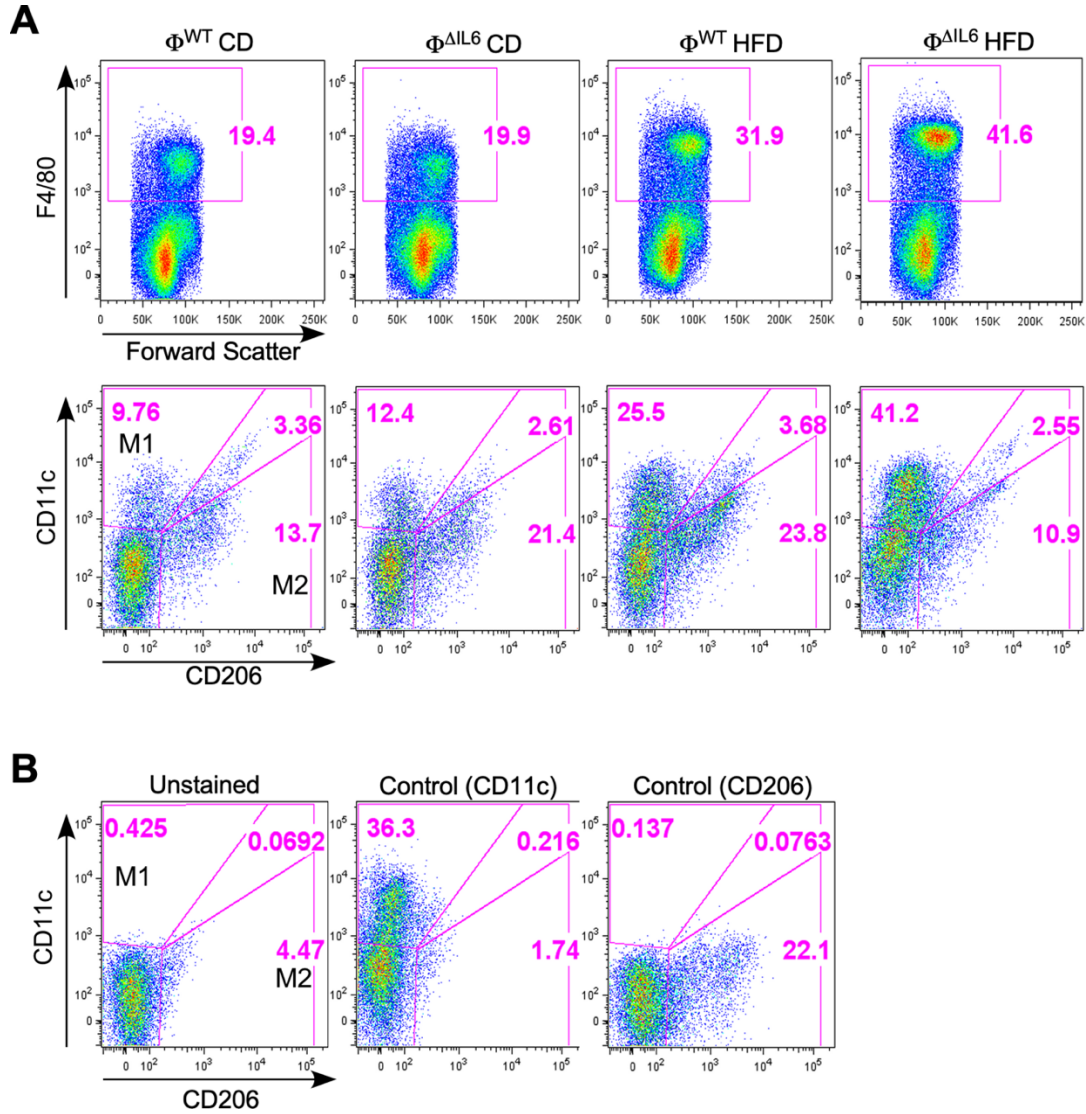

**Fig S6.** (A) The gWAT SVF from CD-fed and HFD-fed (16 wk)  $\Phi^{WT}$  and  $\Phi^{\Delta IL6}$  mice was examined by flow cytometry. Representative data are presented. (B) The strategy employed for flow cytometry analysis is presented. F4/80<sup>+</sup> cells stained without (un-stained; *left panel*) or with CD206 plus an isotype control antibody for CD11c (*middle panel*) or CD11c plus an isotype control antibody for CD206 (*right panel*) were examined. Gates for M1-like (CD11c<sup>+</sup> CD206<sup>-</sup>) and M2-like (CD11c<sup>-</sup> CD206<sup>+</sup>) macrophages are indicated. Representative data are presented.

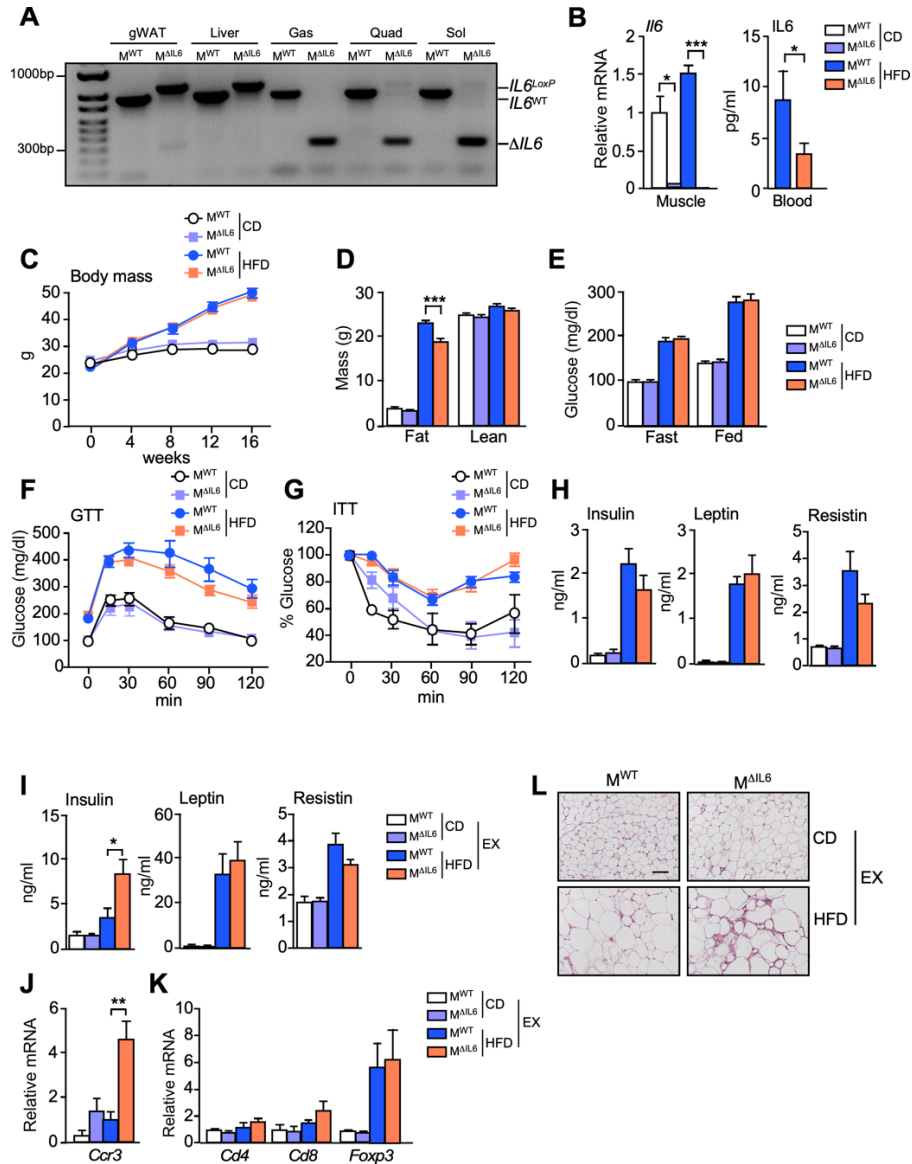

**Fig S7.** (A) Genomic DNA isolated from gWAT, liver, gastrocnemius muscle (Gas), quadriceps muscle (Quad), and soleus muscle (Sol) from  $M^{WT}$  and  $M^{\Delta IL6}$  mice was examined by PCR analysis. (B) Total Gas muscle RNA isolated from CD-fed HFD-fed (16 wk.)  $M^{WT}$  and  $M^{\Delta IL6}$  mice was examined using RT-qPCR analysis to detect *Il6* mRNA expression (*left panel*) and serum IL6 was measured by ELISA (*right panel*) (mean  $\pm$  S.E.M.;  $n = 5 \sim 7$ ;  $*p < 0.05$ ,  $***p < 0.001$ ). (C) The change in body mass of CD-fed and HFD-fed  $M^{WT}$  and  $M^{\Delta IL6}$  mice is presented (mean  $\pm$  S.E.M.;  $n = 6 \sim 11$ ). (D) Body composition was examined by  $^1H$ -MRS (mean  $\pm$  S.E.M.;  $n = 6 \sim 11$ ;  $***p < 0.001$ ). (E) The blood concentration of glucose in overnight fasted mice and the blood glucose concentration in fed mice were measured (mean  $\pm$  S.E.M.;  $n = 7 \sim 11$ ). (F) The CD-fed and HFD-fed (16 wk.) mice were examined by GTT (mean  $\pm$  S.E.M.;  $n = 6 \sim 10$ ). (G) The CD-fed and HFD-fed (16 wk.) mice was examined by ITT (mean  $\pm$  S.E.M.;  $n = 6 \sim 10$ ). (H) The blood concentration of insulin, leptin, and resistin of CD-fed and HFD-fed (16 wk.)  $M^{WT}$  and  $M^{\Delta IL6}$  mice was measured (mean  $\pm$  S.E.M.;  $n = 7 \sim 11$ ). (I) The blood concentration of insulin, leptin, and resistin of exercised (EX) CD-fed and HFD-fed (16 wk.)  $M^{WT}$  and  $M^{\Delta IL6}$  mice was measured (mean  $\pm$  S.E.M.;  $n = 7 \sim 11$ ;  $*p < 0.05$ ). (J, K) The relative expression of the eosinophil marker (*Ccr3*) and T cell markers (*Cd4* and *Cd8*, and *Foxp3*) was measured by RT-PCR assays of mRNA (mean  $\pm$  S.E.M.;  $n = 5 \sim 7$ ;  $**p < 0.01$ ). (L) Sections of gWAT prepared from exercised CD-fed and HFD-fed (16 wk.)  $M^{WT}$  and  $M^{\Delta IL6}$  mice were stained with H&E (scale bar = 100  $\mu m$ ).
